# Supplementary material for: Genome-level Constraint-Based Analysis of Megasphaera sp. MJR8396C Reveals Dual Metabolic Roles in the Human Gut
Source: Research Square preprint supplement (doi:10.21203/rs.3.rs-7827579/v1), 2025-11-11
Supplement: Supplementary file 1 [file 1446805e849f683b3cda7d5e.pdf]

Supplementary Material for Manuscript “Genome-level  
Constraint-Based Analysis of *Megasphaera* *sp.*  
*MJR8396C* Reveals Dual Metabolic Roles in the  
Human Gut”

# 1 Respiratory

The data sets and the code used to produce the material in the manuscript can be found on [here](#).

## 2 Medium for pFBA Simulations

Table 1: Selected medium for pFBA simulations for evaluating nutrient composition’s role in growth and metabolite synthesis. The table denotes constraints for metabolites with exchange reactions, expressed in mmol/gDW/h.

|                        | <b>Gut Medium</b> | <b>AA-rich medium</b> | <b>Carbohydrates-rich medium</b> |
|------------------------|-------------------|-----------------------|----------------------------------|
| L-Glutamate            | 9                 | 10                    | 9                                |
| Mg                     | 7                 | 7                     | 7                                |
| Phosphate              | 6                 | 6                     | 6                                |
| Cl-                    | 5                 | 5                     | 5                                |
| L-Proline              | 5                 | 10                    | 5                                |
| Urate                  | 4                 | 4                     | 4                                |
| Octadecenoate          | 4                 | 4                     | 4                                |
| Palmitate              | 4                 | 4                     | 4                                |
| L-Leucine              | 4                 | 10                    | 4                                |
| Na+                    | 4                 | 4                     | 4                                |
| L-Aspartate            | 4                 | 10                    | 4                                |
| Sucrose                | 3                 | 3                     | 10                               |
| Glycine                | 3                 | 10                    | 3                                |
| L-Serine               | 3                 | 10                    | 3                                |
| L-Alanine              | 3                 | 10                    | 3                                |
| L-Valine               | 3                 | 10                    | 3                                |
| L-Lysine               | 3                 | 10                    | 3                                |
| L-Phenylalanine        | 2                 | 10                    | 2                                |
| L-Isoleucine           | 2                 | 10                    | 2                                |
| L-Threonine            | 2                 | 10                    | 2                                |
| L-Arginine             | 2                 | 10                    | 2                                |
| D-Glucose              | 2                 | 2                     | 10                               |
| CO2                    | 100               | 100                   | 100                              |
| H2O                    | 100               | 100                   | 100                              |
| CELB                   | 100               | 100                   | 100                              |
| H2                     | 100               | 100                   | 100                              |
| K+                     | 100               | 100                   | 100                              |
| Ca2+                   | 100               | 100                   | 100                              |
| H+                     | 100               | 100                   | 100                              |
| Deoxycholate           | 1                 | 1                     | 1                                |
| ocdca                  | 1                 | 1                     | 1                                |
| Continued on next page |                   |                       |                                  |

Table 1 – continued from previous page

|                        | <b>Gut Medium</b> | <b>AA-rich medium</b> | <b>Carbohydrates-rich medium</b> |
|------------------------|-------------------|-----------------------|----------------------------------|
| Myristic acid          | 1                 | 1                     | 1                                |
| Butyrate               | 1                 | 1                     | 1                                |
| Propionate             | 1                 | 1                     | 1                                |
| D-Fructose             | 1                 | 1                     | 10                               |
| Acetate                | 1                 | 1                     | 1                                |
| L-Tyrosine             | 1                 | 10                    | 1                                |
| L-Methionine           | 1                 | 10                    | 1                                |
| L-Histidine            | 1                 | 10                    | 1                                |
| Tetrahydrofolate       | 0.1               | 0.1                   | 0.1                              |
| Ethanol                | 0.1               | 0.1                   | 0.1                              |
| Pyridoxal              | 0.1               | 0.1                   | 0.1                              |
| Xylitol                | 0.1               | 0.1                   | 0.1                              |
| Thiamin                | 0.1               | 0.1                   | 0.1                              |
| octanoate              | 0.1               | 0.1                   | 0.1                              |
| Decanoate              | 0.1               | 0.1                   | 0.1                              |
| L-Tryptophan           | 0.1               | 10                    | 0.1                              |
| Sorbitol               | 0.1               | 0.1                   | 10                               |
| D-Mannitol             | 0.1               | 0.1                   | 10                               |
| LACT                   | 0.1               | 0.1                   | 0.1                              |
| Galactose              | 0.1               | 0.1                   | 10                               |
| Fe2+                   | 0.1               | 0.1                   | 0.1                              |
| Cu2+                   | 0.1               | 0.1                   | 0.1                              |
| PAN                    | 0.1               | 0.1                   | 0.1                              |
| L-Cysteine             | 0.1               | 10                    | 0.1                              |
| BIOT                   | 0.1               | 0.1                   | 0.1                              |
| Fe3                    | 0.1               | 0.1                   | 0.1                              |
| Maltose                | 0.1               | 0.1                   | 10                               |
| Co2+                   | 0.1               | 0.1                   | 0.1                              |
| Sulfate                | 0.1               | 0.1                   | 0.1                              |
| Zn2+                   | 0.1               | 0.1                   | 0.1                              |
| Mn2+                   | 0.1               | 0.1                   | 0.1                              |
| Xylitol                | 0.1               | 0.1                   | 10                               |
| Xylose                 | 0                 | 0                     | 10                               |
| D-Mannose              | 0                 | 0                     | 10                               |
| Melibiose              | 0                 | 0                     | 10                               |
| L-Arabinose            | 0                 | 0                     | 10                               |
| D-Arabinose            | 0                 | 0                     | 10                               |
| Galactose              | 0                 | 0                     | 10                               |
| D-Mannose              | 0                 | 0                     | 10                               |
| D-Glucarate            | 0                 | 0                     | 10                               |
| Glycolate              | 0                 | 0                     | 10                               |
| Galacturonate          | 0                 | 0                     | 10                               |
| Continued on next page |                   |                       |                                  |

Table 1 – continued from previous page

|             | <b>Gut Medium</b> | <b>AA-rich<br/>medium</b> | <b>Carbohydrates-<br/>rich medium</b> |
|-------------|-------------------|---------------------------|---------------------------------------|
| Galactonate | 0                 | 0                         | 10                                    |

### 3 OptForce suggested interventions

Table 2: Must Decrease (mustL) Reactions

| Reaction       | Name                                                                         | Equation                                                                                                 |
|----------------|------------------------------------------------------------------------------|----------------------------------------------------------------------------------------------------------|
| EX_cpd00036_e0 | Succinate exchange                                                           | Succinate $\leftrightarrow$                                                                              |
| EX_cpd00309_e0 | XAN exchange                                                                 | XAN $\leftrightarrow$                                                                                    |
| Bio1           | Biomass                                                                      |                                                                                                          |
| rxn01637_c0    | N2-Acetyl-L-ornithine:2-oxoglutarate aminotransferase                        | 2-Oxoglutarate + N-Acetylornithine $\leftrightarrow$ L-Glutamate + 2-Acetamido-5-oxopentanoate           |
| rxn02465_c0    | N-acetyl-L-glutamate-5-semialdehyde:NADP+ 5-oxidoreductase (phosphorylating) | NADP + Phosphate + 2-Acetamido-5-oxopentanoate $\leftrightarrow$ NADPH + H+ + n-acetylglutamyl-phosphate |
| rxn05319_c0    | TRANS-RXNBWI-115401.ce.maizeexp.OH.OH                                        | H2O $\leftrightarrow$ H2O                                                                                |
| rxn05636_c0    | TRANS-RXN-207.ce                                                             | H+ + Urate $\leftrightarrow$ H+ + Urate                                                                  |
| rxn05683_c0    | Butyrate transport via proton symport, reversible                            | H+ + Butyrate $\leftrightarrow$ H+ + Butyrate                                                            |

Table 4: Must Increase (mustU) Reactions

| Reaction       | Name                                                                   | Equation                                                                                                        |
|----------------|------------------------------------------------------------------------|-----------------------------------------------------------------------------------------------------------------|
| EX_cpd00001_e0 | H2O exchange                                                           | H2O $\rightarrow$ $\bar{H}_2O$                                                                                  |
| EX_cpd00009_e0 | Phosphate exchange                                                     | P $\rightarrow$ $\bar{P}$                                                                                       |
| EX_cpd00027_e0 | Glucose exchange                                                       | Glucose $\rightarrow$ $\bar{G}$                                                                                 |
| EX_cpd00300_e0 | Urate exchange                                                         | C5H4N4O3 $\rightarrow$ $\bar{C}_5H_4N_4O_3$                                                                     |
| Rxn00178_c0    | Acetyl-CoA:acetyl-CoA<br>C-acetyltransferase                           | 2 Acetyl-CoA $\rightarrow$ $\bar{C}$ CoA +<br>Acetoacetyl-CoA                                                   |
| Rxn00192_c0    | acetyl-CoA:L-glutamate<br>N-acetyltransferase                          | Acetyl-CoA + L-Glutamate $\rightarrow$ $\bar{C}$<br>CoA + H+ +<br>N-Acetyl-L-glutamate                          |
| Rxn00337_c0    | ATP:L-aspartate<br>4-phosphotransferase                                | ATP + L-Aspartate $\rightarrow$ $\bar{A}$ ADP +<br>4-Phospho-L-aspartate                                        |
| Rxn00459_c0    | 2-phospho-D-glycerate<br>hydro-lyase                                   | 2-Phospho-D-glycerate $\rightarrow$ $\bar{G}$ H2O +<br>Phosphoenolpyruvate                                      |
| Rxn00541_c0    | L-threonine acetaldehyde-lyase                                         | L-Threonine $\rightarrow$ $\bar{T}$ Glycine +<br>Acetaldehyde                                                   |
| Rxn00692_c0    | 5,10-<br>Methylenetetrahydrofolate:glycine<br>hydroxymethyltransferase | H2O + Glycine +<br>5-10-Methylenetetrahydrofolate<br>$\rightarrow$ $\bar{G}$ L-Serine + Tetrahydrofolate        |
| Rxn00802_c0    | 2-(Nomega-L-arginino)succinate<br>arginine-lyase                       | L-Argininosuccinate $\rightarrow$ $\bar{A}$<br>L-Arginine + Fumarate                                            |
| Rxn01019_c0    | Carbamoyl-phosphate:L-ornithine<br>carbamoyltransferase                | Ornithine +<br>Carbamoylphosphate $\rightarrow$ $\bar{C}$<br>Phosphate + H+ + Citrulline                        |
| Rxn01069_c0    | O-phospho-L-homoserine<br>phosphate-lyase                              | H2O + O-Phospho-L-homoserine<br>$\rightarrow$ $\bar{P}$ Phosphate + L-Threonine                                 |
| Rxn01300_c0    | ATP:L-homoserine<br>O-phosphotransferase                               | ATP + L-Homoserine $\rightarrow$ $\bar{A}$ ADP +<br>H+ + O-Phospho-L-homoserine                                 |
| Rxn01434_c0    | L-Citrulline:L-aspartate ligase                                        | ATP + L-Aspartate + Citrulline<br>$\rightarrow$ $\bar{C}$ PPi + AMP + 2 H+ +<br>L-Argininosuccinate             |
| Rxn01522_c0    | xanthine:NAD+ oxidoreductase                                           | H2O + NAD + XAN $\rightarrow$ $\bar{N}$ NADH<br>+ H+ + Urate                                                    |
| Rxn01917_c0    | ATP:N-acetyl-L-glutamate<br>5-phosphotransferase                       | ATP + N-Acetyl-L-glutamate $\rightarrow$ $\bar{A}$<br>ADP +<br>n-acetylglutamyl-phosphate                       |
| Rxn05202_c0    | TRANS-RXN-206.ce                                                       | H+ + XAN $\rightarrow$ $\bar{H}$ H+ + XAN                                                                       |
| Rxn31312       | '2-oxoglutarate synthase'                                              | CoA + 2-Oxoglutarate + Oxi-<br>dizedferredoxin $\rightarrow$<br>CO2 + H+ + Succinyl-<br>CoA + Reducedferredoxin |

## 4 *In Silico* Simulation of Microbe-microbe Interactions

Table 6: Community constraints applied in FBA simulations to evaluate the cross-feeding potential of acetate and D-lactate within a community comprising *Bifidobacterium adolescentis* and *Megasphaera sp. MJR8396C*. These constraints are derived from individual simulations utilizing minimal medium and are specified for metabolites with exchange reactions, quantified in mmol/gDW/h.

|                  | <b>Community constraints</b> | <b><i>Bifidobacterium adolescentis</i> constraints</b> | <b><i>Megasphaera sp.</i> constraints</b> |
|------------------|------------------------------|--------------------------------------------------------|-------------------------------------------|
| Pyridoxal        | 0.003947                     | -                                                      | 0.003947                                  |
| Riboflavin       | 0.010331                     | 0.010331                                               | -                                         |
| PAN              | 0.010331                     | 0.010331                                               | -                                         |
| Nicotinamide     | 0.010331                     | 0.010331                                               | -                                         |
| Thiamin          | 0.009112                     | 0.005165                                               | 0.003947                                  |
| Tetrahydrofolate | 0.015496                     | 0.015496                                               | -                                         |
| MN2+             | 0.014588                     | 0.007294                                               | 0.007294                                  |
| Zn2+             | 0.014588                     | 0.007294                                               | 0.007294                                  |
| Cu2+             | 0.014588                     | 0.007294                                               | 0.007294                                  |
| Ca2+             | 0.014588                     | 0.007294                                               | 0.007294                                  |
| Cl-              | 0.014588                     | 0.007294                                               | 0.007294                                  |
| Mg               | 0.014588                     | 0.007294                                               | 0.007294                                  |
| fe3              | 0.014588                     | 0.007294                                               | 0.007294                                  |
| K+               | 0.014588                     | 0.007294                                               | 0.007294                                  |
| Fe2+             | 0.022482                     | 0.007294                                               | 0.015188                                  |
| L-tryptophan     | 0.063239                     | 0.063239                                               | -                                         |
| L-tryosine       | 0.128856                     | 0.128856                                               | -                                         |
| L-Phenylalanine  | 0.204458                     | 0.204458                                               | -                                         |
| L-Histidine      | 0.089931                     | -                                                      | 0.089931                                  |
| ocdca            | 0.16789                      | 0.084654                                               | 0.083236                                  |
| L-cysteine       | 0.2                          | 0.1                                                    | 0.1                                       |
| L-Lysine         | 0.32575                      | -                                                      | 0.32575                                   |
| L-Leucine        | 0.510908                     | -                                                      | 0.510908                                  |
| Phosphate        | 3.261986                     | 2.255919                                               | 1.006067                                  |
| D-Glucose        | 2                            | -                                                      | 2                                         |
| L-Arginine       | 2                            | -                                                      | 2                                         |
| L-Methionine     | 2                            | 1                                                      | 1                                         |
| Glycine          | 3                            | -                                                      | 3                                         |
| L-Alanine        | 3                            | -                                                      | 3                                         |
| L-Serine         | 3                            | -                                                      | 3                                         |
| Sucrose          | 3                            | -                                                      | 3                                         |
| L-aspartate      | 4                            | -                                                      | 4                                         |
| L-Threonine      | 4                            | 2                                                      | 2                                         |
| Urate            | 4                            | -                                                      | 4                                         |

Continued on next page

Table 6 – continued from previous page

|             | <b>Community constraints</b> | <b><i>Bifidobacterium adolescentis</i> constraints</b> | <b><i>Megasphaera sp.</i> constraints</b> |
|-------------|------------------------------|--------------------------------------------------------|-------------------------------------------|
| L-Glutamate | 9                            | 9                                                      | 9                                         |
| CELB        | 100                          | 100                                                    | -                                         |
| Co2+        | 0                            | 0.007294                                               | 0.007294                                  |
| Acetate     | -                            | -                                                      | 100                                       |
| D-Lactate   | -                            | -                                                      | 100                                       |

## 5 Pairwise interactions

Organisms can exert positive, negative, and neutral effects on each other. Negatively, competition (-/-) diminishes the functioning of both species involved, whereas amensalism (-/0) harms one species while the other remains unaffected. Conversely, on the positive side, parasitism (+/-) benefits one member at the expense of the other, commensalism (+/0) benefits one member while having no effect on the other, and mutualism (+/+) benefits both species involved. By using a similar approach to *Heinken et al.*, pairwise interactions were simulated for *Megasphaera sp. MJR8396C* and *Bifidobacterium adolescentis*. The pairwise interactions were assessed across various media to determine their susceptibility to nutrient availability. The simulated media included a gut medium, an amino acid-rich medium, a carbohydrate-rich medium, as well as adaptations of a Western diet and a high-fiber diet, sourced from *Magnusdottir et al.*. The results are given in Table 7. Across all media except the amino acid-rich medium, the interaction exhibited amensalism, characterized by *Bifidobacterium*’s growth remaining hardly affected while the growth rate of *Megasphaera sp. MJR8396C* dropped to almost negligible levels. However, for the interaction involving the amino acid-rich medium, a parasitic relationship emerged. Here, the growth of *Megasphaera sp. MJR8396C* increased significantly while *Bifidobacterium*’s growth decreased, suggesting that *Megasphaera sp. MJR8396C* prospers at the expense of *Bifidobacterium*.

Table 7: Growth rates of *Bifidobacterium adolescentis* and *Megasphaera sp. MJR8396C* in different media and their interactions.

| <b>Medium</b>            | <b>Paired Growth B.</b> | <b>Paired Growth M.</b> | <b>Single Growth B.</b> | <b>Single Growth M.</b> | <b>Interaction</b> |
|--------------------------|-------------------------|-------------------------|-------------------------|-------------------------|--------------------|
| Gut Medium               | 1.402                   | 0.001                   | 1.403                   | 1.114                   | Amensalism         |
| Amino Acid-Rich Medium   | 0.075                   | 5.864                   | 4.472                   | 2.056                   | Parasitism         |
| Carbohydrate Rich Medium | 1.402                   | 0.001                   | 1.403                   | 1.114                   | Amensalism         |
| Western Diet             | 1.402                   | 0.001                   | 1.403                   | 1.114                   | Amensalism         |
| High Fiber Diet          | 1.402                   | 0.001                   | 1.403                   | 1.114                   | Amensalism         |



Table 9: Additional Western Diet (WD) and High Fiber diet (HF) medium for pairwise interaction simulations, adapted from Magnúsdóttir et al. and adjusted to gut medium. The table denotes constraints for metabolites with exchange reactions, expressed in mmol/gDW/h.

| Metabolite       | WD adjusted to GM | HF adjusted to GM |
|------------------|-------------------|-------------------|
| H2O              | 100               | 100               |
| Phosphate        | 6                 | 6                 |
| CO2              | 100               | 100               |
| L-Glutamate      | 9                 | 9                 |
| D-Glucose        | 10                | 2                 |
| Acetate          | 1                 | 1                 |
| MN2+             | 0.1               | 0.1               |
| Glycine          | 3                 | 3                 |
| Zn2+             | 0.1               | 0.1               |
| L-Alanine        | 3                 | 3                 |
| L-Lysine         | 3                 | 3                 |
| L-aspartate      | 4                 | 4                 |
| SO4              | 0.1               | 0.1               |
| L-Arginine       | 2                 | 2                 |
| L-Serine         | 3                 | 3                 |
| Cu2+             | 0.1               | 0.1               |
| L-Methionine     | 1                 | 1                 |
| Ca2+             | 100               | 100               |
| L-tryptophan     | 0.1               | 0.1               |
| L-Phenylalanine  | 2                 | 2                 |
| H+               | 100               | 100               |
| L-tyrosine       | 1                 | 1                 |
| Sucrose          | 10                | 3                 |
| D-fructose       | 10                | 1                 |
| L-cysteine       | 0.1               | 0.1               |
| Tetrahydrofolate | 0.1               | 0.1               |
| Cl-              | 5                 | 5                 |
| Glycerol         | 10                | 0                 |
| BIOT             | 0.1               | 0.1               |
| D-ribose         | 10                | 0.1               |
| L-Leucine        | 4                 | 4                 |
| Galactose        | 10                | 0.1               |
| L-Histidine      | 1                 | 1                 |
| L-Proline        | 5                 | 5                 |
| Nicotinamide     | 0.1               | 0.1               |
| D-Mannose        | 10                | 0.1               |
| Propionate       | 1                 | 1                 |
| Co               | 0.1               | 0.1               |
| Xylose           | 10                | 0.1               |
| L-valine         | 3                 | 3                 |

*Continued on next page*

*Continued from previous page*

| <b>Metabolite</b>      | <b>WD adjusted to GM</b> | <b>HF adjusted to GM</b> |
|------------------------|--------------------------|--------------------------|
| CELB                   | 100                      | 100                      |
| L-Threonine            | 2                        | 2                        |
| Maltose                | 10                       | 0.1                      |
| K+                     | 100                      | 100                      |
| LACT                   | 0.1                      | 0.1                      |
| Butyrate               | 1                        | 1                        |
| Palmitate              | 4                        | 4                        |
| Pyridoxal              | 0.1                      | 0.1                      |
| Riboflavin             | 0.1                      | 0.1                      |
| L-Arabinose            | 10                       | 0.1                      |
| Mg                     | 7                        | 7                        |
| Urate                  | 4                        | 4                        |
| Thiamin                | 0.1                      | 0.1                      |
| Xylitol                | 0.1                      | 0.1                      |
| D-Mannitol             | 10                       | 0.1                      |
| L-Isoleucine           | 2                        | 2                        |
| Ethanol                | 0.1                      | 0.1                      |
| L-Rhamnose             | 10                       | 0.1                      |
| Sorbitol               | 0.1                      | 0.1                      |
| PAN                    | 0.1                      | 0.1                      |
| L-Fucose               | 10                       | 0.1                      |
| Na+                    | 4                        | 4                        |
| ocdca                  | 1                        | 1                        |
| Decanoate              | 0.1                      | 0.1                      |
| Glycocholate           | 1                        | 1                        |
| beta-lactose           | 10                       | 0.1                      |
| Chemodeoxycholate      | 1                        | 1                        |
| Deoxycholate           | 1                        | 1                        |
| Taurocholate           | 1                        | 1                        |
| Melibiose              | 10                       | 0.1                      |
| Taurochenodeoxycholate | 1                        | 1                        |
| Glycochenodeoxycholate | 1                        | 1                        |
| octanoate              | 10                       | 0.1                      |
| Myristic Acid          | 1                        | 1                        |
| Fe2+                   | 0.1                      | 0.1                      |
| Fe3                    | 0.1                      | 0.1                      |
| H2                     | 100                      | 100                      |
| hexadecenoate          | 10                       | 0.1                      |
| octadecenoate          | 10                       | 4                        |
| tetradecenoate         | 10                       | 0.1                      |
| starch (n=27)          | 10                       | 0.1                      |
| starch (n=19)          | 0.1                      | 10                       |

## 6 BacArena

In addition, BacArena simulations were utilized to deepen the understanding of interaction mechanisms between *Megasphaera sp. MJR8396C* and *Bifidobacterium adolescentis* within a standard gut medium and an amino-acid-enriched medium. The simulations spanned a 24-hour period, providing insight into the growth dynamics of the microbial communities. Figures 1 and 2 present the resulting growth curves and the associated variations in metabolite concentrations throughout the simulation.

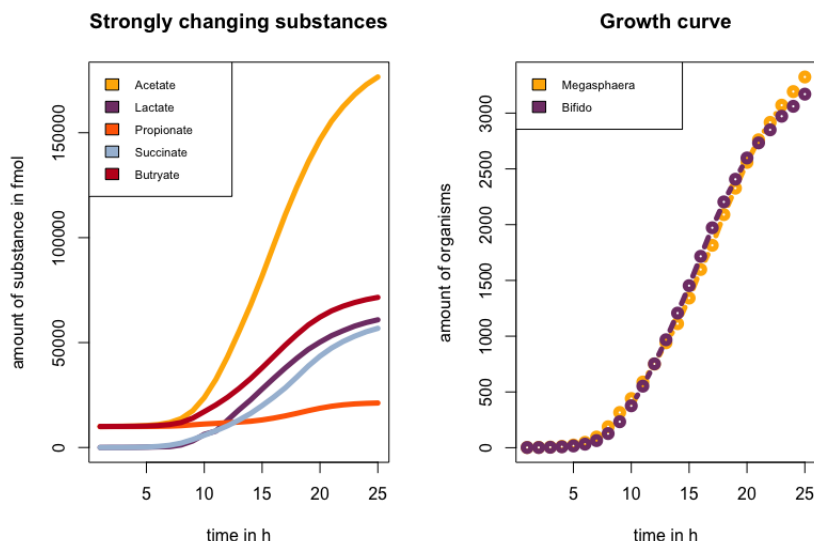

Figure 1: BacArena simulations conducted for *Megasphaera* MJR8396C and *Bifidobacterium adolescentis* across a 24-hour period using gut medium.

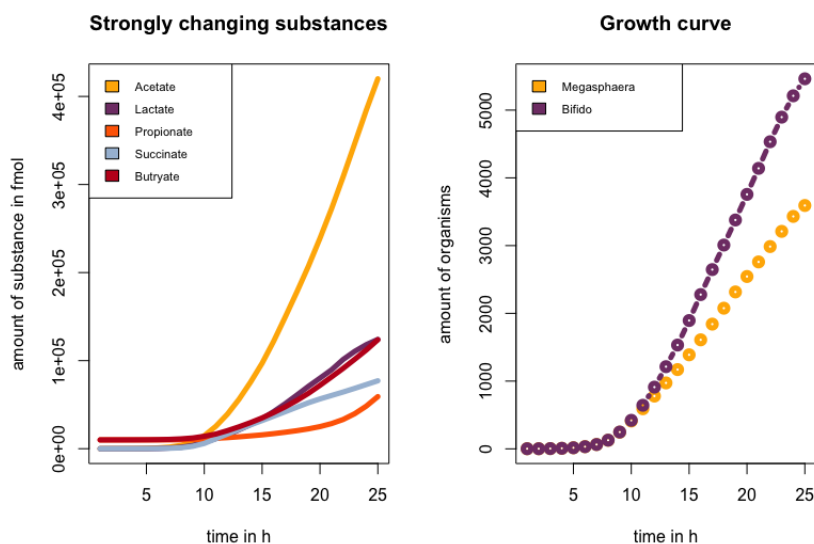

Figure 2: BacArena simulations conducted for *Megasphaera* MJR8396C and *Bifidobacterium adolescentis* across a 24-hour period using amino acid-rich medium.

Both *Megasphaera* sp. *MJR8396C* and *Bifidobacterium adolescentis* demonstrated growth, as evidenced by the growth curves showing logarithmic or exponential phases typical in nutrient-rich environments. In the gut medium, both organisms exhibited similar growth patterns; however, in the amino acid-rich medium, *Bifidobacterium*'s abundance slightly increased. The temporal profiles of lactate and butyrate production were observed to mirror each other, suggesting a synchronized pattern across the different media. Particularly in an amino acid-enriched medium, these production pathways seemed more closely aligned, with notable increases in lactate production coinciding with a higher presence of *Bifidobacterium* organisms. Acetate production was consistently high in both media types. Additionally, the presence of amino acids was associated with increased levels of lactate, propionate, succinate, and butyrate, reflecting enhanced microbial activity.
